# Supplementary material
Source: PubMed Central journal article supplement (PMC6646215)
Supplement: ao8b01692_si_001.pdf [file ao8b01692_si_001.pdf]

## **SUPPLEMENTARY MATERIAL**

**NMR based metabolomics approach to elucidate the differential cellular responses during mitigation of arsenic (III, V) in a green microalga**

**Neha Arora<sup>1#</sup>, Durgesh Dubey<sup>3#</sup>, Meenakshi Sharma<sup>1</sup>, Alok Patel<sup>1</sup>, Anupam Guleria<sup>3</sup>,  
Parul A. Pruthi<sup>1</sup>, Dinesh Kumar<sup>3\*</sup>, Vikas Pruthi<sup>1,2\*</sup>, Krishna Mohan Poluri<sup>1,2\*</sup>**

<sup>1</sup>Department of Biotechnology, <sup>2</sup>Centre for transportation systems (CTRANS), Indian Institute of Technology Roorkee, Roorkee - 247667, Uttarakhand, India

<sup>3</sup>Centre of Biomedical Research, SGPGIMS, Lucknow – 226014, Uttar Pradesh, India

### **\*Corresponding Authors**

**Dr. Dinesh Kumar**

**Email:** [dineshcmbbr@gmail.com](mailto:dineshcmbbr@gmail.com)

**Prof. Vikas Pruthi**

**Email:** [vikasfbs@iitr.ac.in](mailto:vikasfbs@iitr.ac.in)

**Dr. Krishna Mohan Poluri**

**Email:** [mohanpmk@gmail.com](mailto:mohanpmk@gmail.com); [krishfbs@iitr.ac.in](mailto:krishfbs@iitr.ac.in)

**Ph:** [+91-1332-284779](tel:+91-1332-284779)

**Fax:** [+91-1332-286151](tel:+91-1332-286151)

**#Authors contributed equally**

**Figure S1:** (A) IC<sub>50</sub> value and, (B) arsenic removal efficiency of *Scenedesmus* sp. IITRIND2 different concentrations (0-500 mg/L) As (III) and As (V)

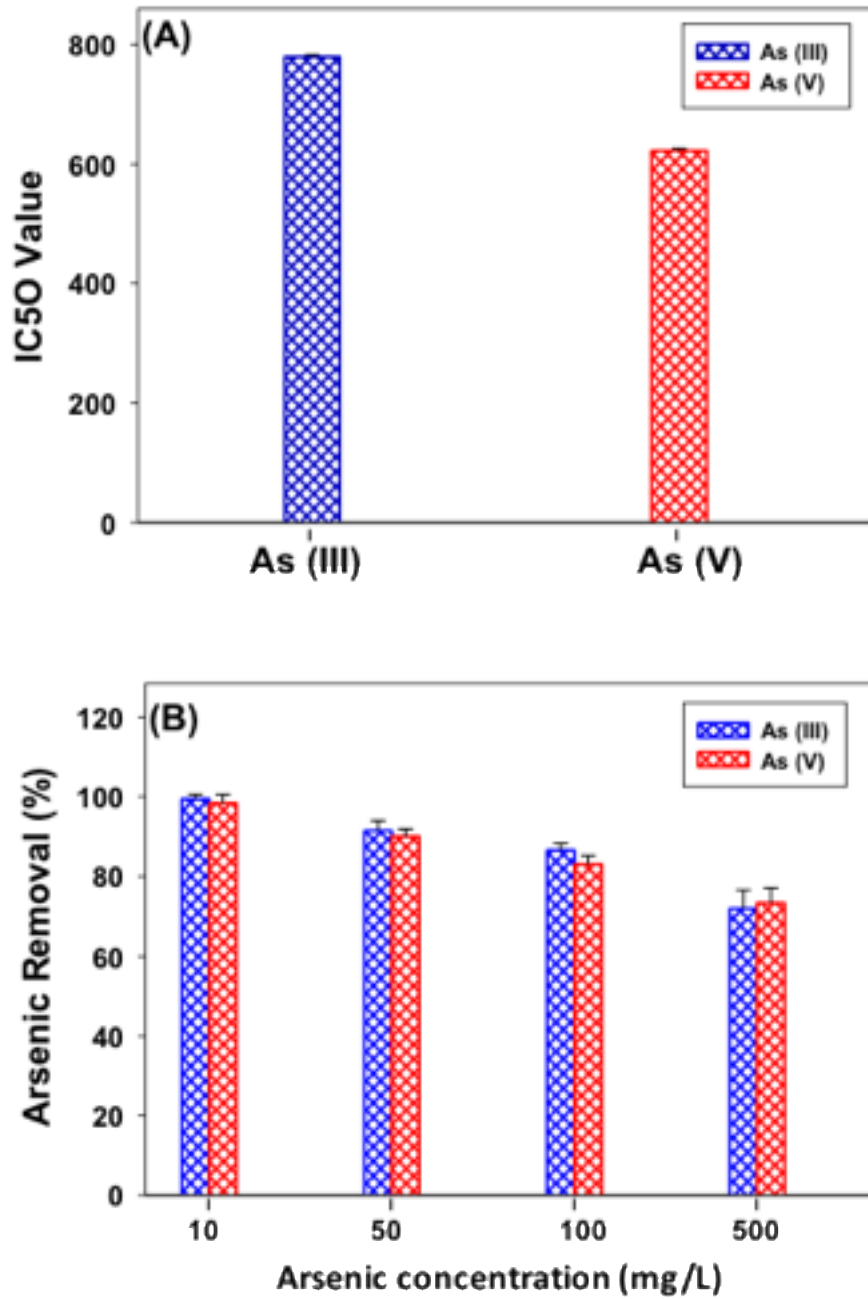

**Figure S2:** The representative 800 MHz  $^1\text{H}$ - $^1\text{H}$  TOCSY spectrum of *Scenedesmus* sp. IITRIND2 showing CH cross-peak assignments for various metabolites.

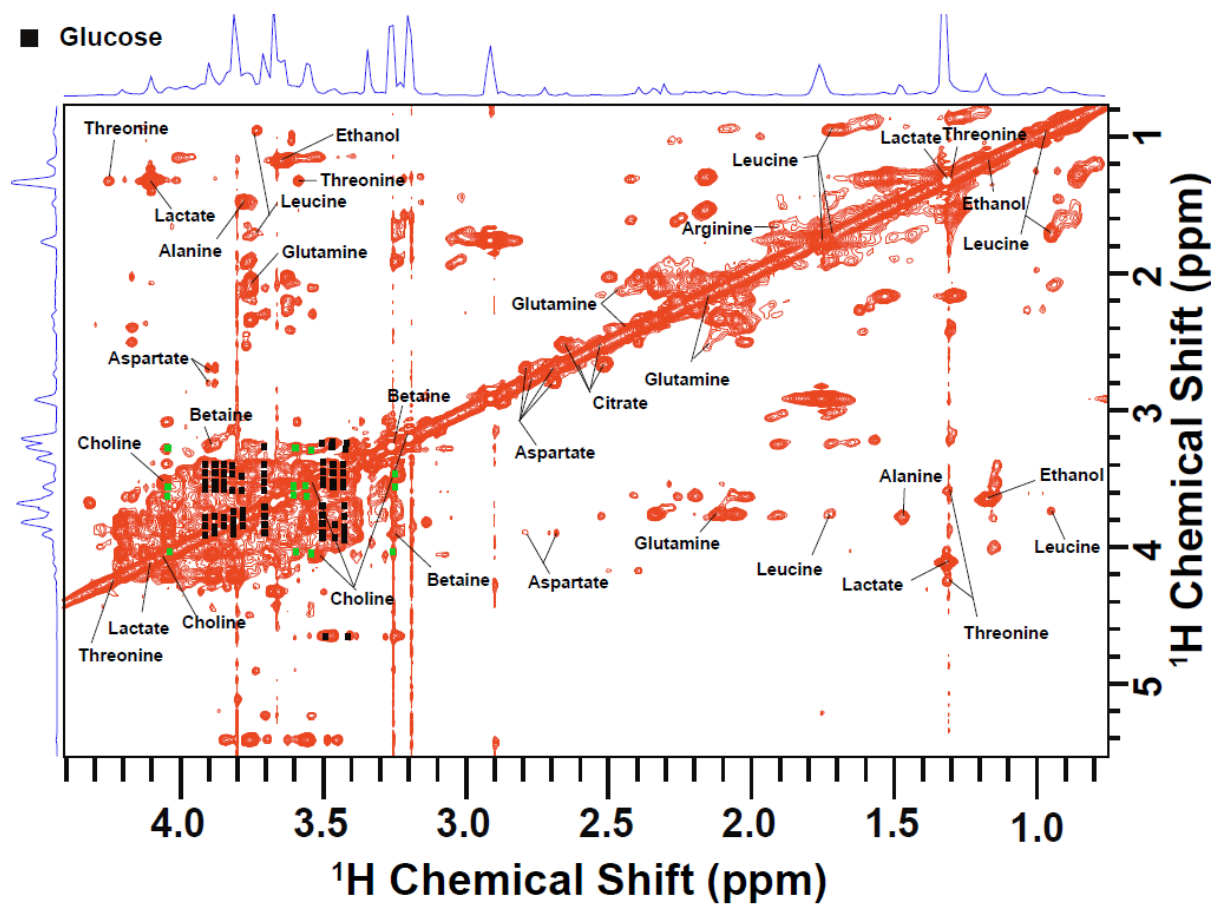

**Figure S3:** The representative 800 MHz  $^1\text{H}$ - $^1\text{H}$  J-Resolved (JRES) spectrum of *Scenedesmus* sp. ITRIND2 showing CH cross-peak assignments for various metabolites. Two different spectral region of the JRES spectrum are expanded for improved visualization: **Top Panel** -  $\delta(0.9\text{-}2.8)$  ppm and, **Bottom Panel** -  $\delta(3.1\text{-}4.6)$  ppm. Assigned peaks are annotated, whereas unassigned (UA) metabolite signals are labelled as UA.

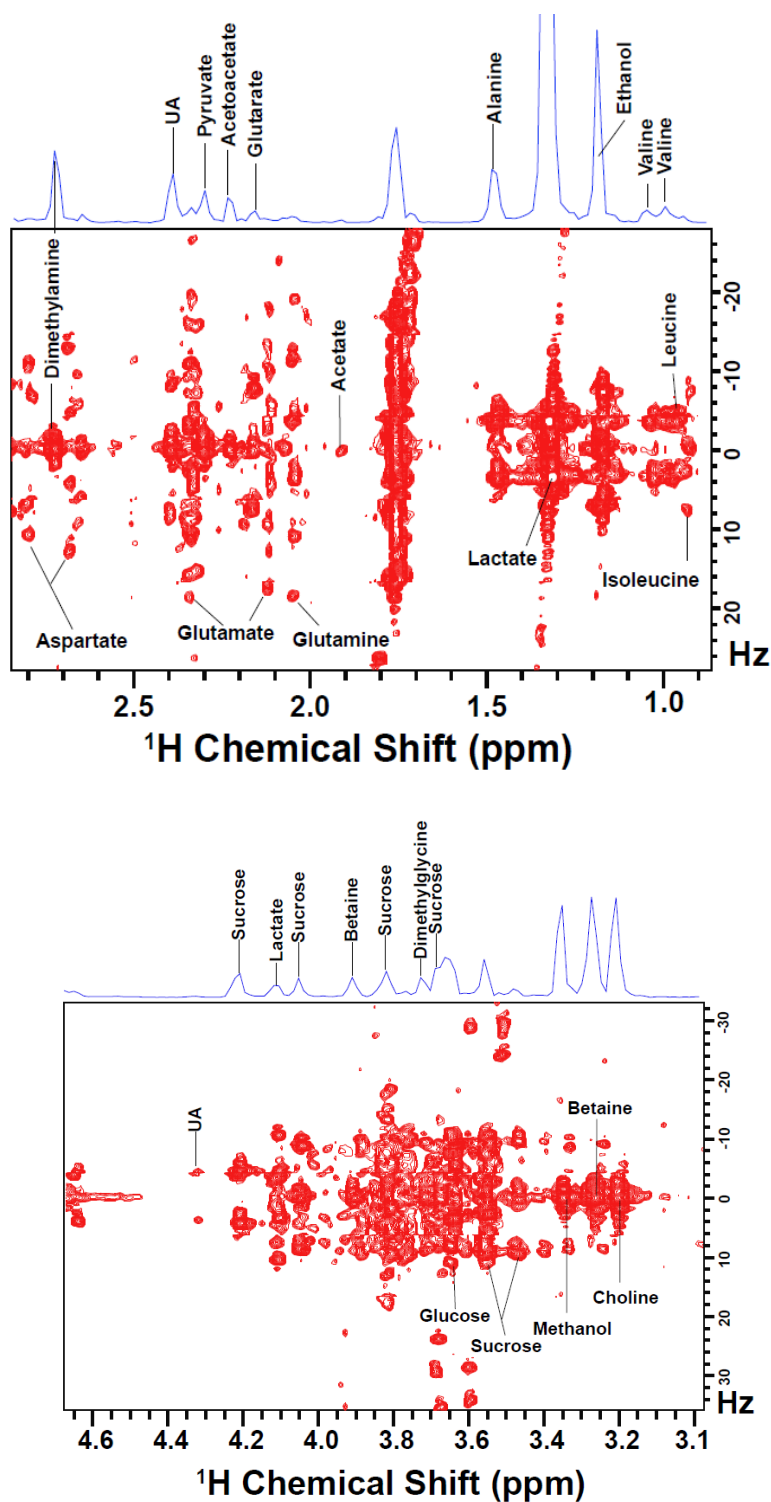

**Fig. S4:** The representative 800 MHz  $^1\text{H}$ - $^{13}\text{C}$  HSQC spectrum of *Scenedesmus* sp. IITRIND2 showing CH cross-peak assignments for various metabolites. GPC – Glycerophosphocholine.

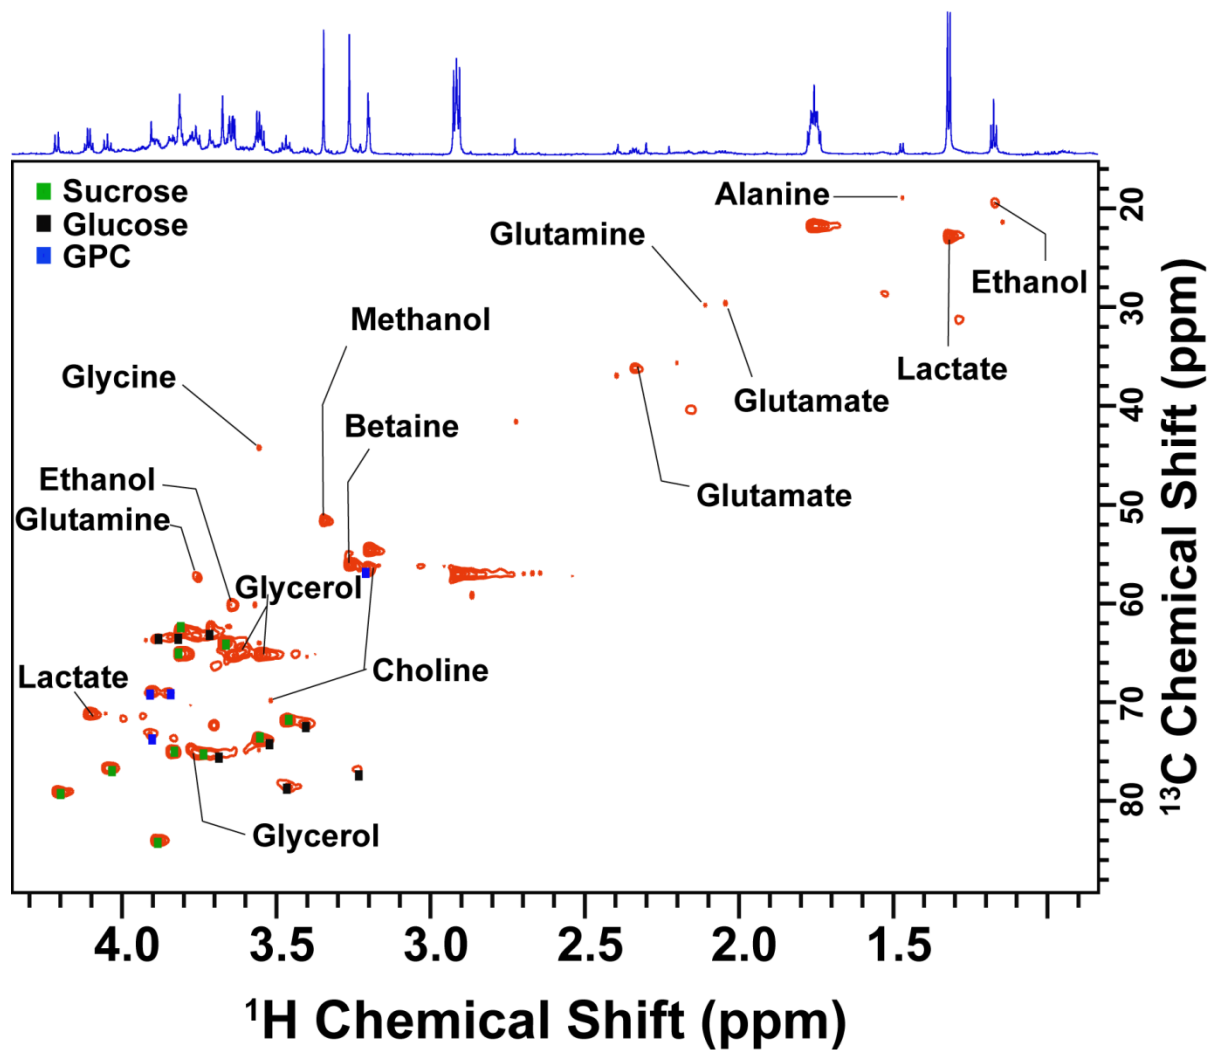

**Table S1:** List of metabolites along with their respective chemical shifts and their respective metabolic change patterns as a consequence of uptake of Arsenic III and V metal uptake. one-way ANOVA was conducted to determine significant ( $p < 0.001$ ) metabolic changes. The up ( $\uparrow$ ) and down ( $\downarrow$ ) arrows represent, respectively, increased and decreased metabolite levels.

| Metabolite Name                         | Assignment                 | Chemical shifts ( $\delta$ ) in ppm | Relative Change*            |                           |
|-----------------------------------------|----------------------------|-------------------------------------|-----------------------------|---------------------------|
|                                         |                            |                                     | As (III) Spiking vs Control | As (V) Spiking vs Control |
| <b>Amino acids</b>                      |                            |                                     |                             |                           |
| Leucine                                 | $\delta$ -CH3              | 0.95 (d)                            | $\uparrow$                  | $\uparrow\uparrow$        |
|                                         | $\delta$ -CH3              | 0.96 (d) <sup>€</sup>               |                             |                           |
| Isoleucine                              | $\gamma$ -CH3              | 0.93 (t) <sup>€</sup>               | $\uparrow$                  | $\uparrow\uparrow$        |
|                                         | $\delta$ -CH3              | 1.00 (d)                            |                             |                           |
| Valine                                  | $\gamma$ -CH3              | 0.98 (d)                            | --                          | $\uparrow\uparrow$        |
|                                         | $\gamma$ -CH3              | 1.03 (d) <sup>€</sup>               |                             |                           |
| Threonine                               | $\gamma$ -CH <sub>3</sub>  | 1.29 (d) <sup>€</sup>               | --                          | $\uparrow$                |
| Alanine                                 | $\beta$ -CH <sub>3</sub>   | 1.47 (d) <sup>€</sup>               | $\uparrow$                  | $\uparrow\uparrow$        |
|                                         | $\alpha$ -CH               | 3.79 (q)                            |                             |                           |
| Proline                                 | $\gamma$ -CH2              | 2.00 (m) <sup>€</sup>               | $\uparrow$                  | $\uparrow\uparrow$        |
|                                         | $\frac{1}{2}$ $\beta$ -CH2 | 2.06 (m)                            |                             |                           |
|                                         | $\frac{1}{2}$ $\beta$ -CH2 | 2.34 (m)                            |                             |                           |
| Glutamate                               | $\beta$ -CH <sub>2</sub>   | 2.11 (m) <sup>€</sup>               | $\uparrow$                  | $\uparrow\uparrow$        |
|                                         | $\gamma$ -CH <sub>2</sub>  | 2.34 (m)                            |                             |                           |
| Glutamine                               | $\beta$ -CH <sub>2</sub>   | 2.12 (m)                            | --                          | $\uparrow$                |
|                                         | $\gamma$ -CH <sub>2</sub>  | 2.44 (m) <sup>€</sup>               |                             |                           |
| N,N-Dimethylamine (DMA) <sup>#</sup>    | N-CH <sub>3</sub>          | 2.71 (s)                            | --                          | $\uparrow$                |
| Sacrosine <sup>#</sup>                  | N-CH <sub>3</sub>          | 2.72 (s)                            | --                          | $\uparrow$                |
| N,N,N-Trimethylamine (TMA) <sup>#</sup> | N-CH <sub>3</sub>          | 2.86 (s)                            | $\uparrow$                  | $\uparrow$                |
| Glycine                                 | $\alpha$ -CH <sub>2</sub>  | 3.56 (s)                            | $\uparrow$                  | $\uparrow\uparrow$        |

|                                  |                                                                                                 |                                               |    |    |
|----------------------------------|-------------------------------------------------------------------------------------------------|-----------------------------------------------|----|----|
| Cysteine                         | $\beta$ -CH <sub>2</sub><br>$\alpha$ -CH                                                        | 3.07 (m)<br>3.97 (dd) <sup>ε</sup>            | ↑  | ↑↑ |
| N,N-dimethylglycine              | N-CH <sub>3</sub>                                                                               | 3.71 (s)                                      | ↑  | ↑↑ |
| Tyrosine                         | C <sub>2</sub> H & C <sub>6</sub> H<br>C <sub>3</sub> H & C <sub>5</sub> H                      | 6.88 (d) <sup>ε</sup><br>7.18 (d)             | ↑↑ | ↑  |
| Phenylalanine                    | C <sub>2</sub> H & C <sub>6</sub> H<br>C <sub>4</sub> H<br>C <sub>3</sub> H & C <sub>5</sub> H  | 7.31 (m)<br>7.37 (m)<br>7.43 (m) <sup>ε</sup> | ↑  | ↑  |
| $\gamma$ -glutamyl-phenylalanine | C <sub>2</sub> H, C <sub>6</sub> H &<br>C <sub>4</sub> H<br>C <sub>3</sub> H & C <sub>5</sub> H | 7.3 (m) <sup>ε</sup><br><br>7.4 (m)           | ↑  | ↑↑ |
| Organic acids                    |                                                                                                 |                                               |    |    |
| Lactate                          | $\beta$ -CH <sub>3</sub><br>$\alpha$ -CH                                                        | 1.32 (d)<br>4.10 (q) <sup>ε</sup>             | ↑↑ | ↑  |
| Acetate                          | CH <sub>3</sub>                                                                                 | 1.91 (s)                                      | -- | ↑  |
| Glutarate                        | $\beta$ , $\delta$ -CH <sub>2</sub>                                                             | 2.16 (t)                                      | -- | ↑  |
| Succinate                        | $\alpha$ , $\beta$ -CH <sub>2</sub>                                                             | 2.39 (s)                                      | -- | ↑↑ |
| Citrate                          | $\frac{1}{2}$ $\gamma$ -CH <sub>2</sub><br>$\frac{1}{2}$ $\gamma$ -CH <sub>2</sub>              | 2.52 (d) <sup>ε</sup><br>2.69 (d)             | -- | ↑↑ |
| Fumarate                         | CH                                                                                              | 6.51 (s)                                      | ↑↑ | ↑↑ |
| Formate                          | CH                                                                                              | 8.44 (s)                                      | ↑↑ | ↑↑ |
| Carbohydrates/sugar              |                                                                                                 |                                               |    |    |
| Sucrose                          | C <sub>10</sub> H<br>C <sub>12</sub> H                                                          | 3.46 (t)<br>3.55 (dd)                         | ↑  | ↑↑ |

|                     |                                                                                    |                                   |    |    |
|---------------------|------------------------------------------------------------------------------------|-----------------------------------|----|----|
|                     | C13H                                                                               | 3.66 (s)                          |    |    |
|                     | C11H                                                                               | 3.75 (m)                          |    |    |
|                     | C17H & C19H                                                                        | 3.77 (m)                          |    |    |
|                     | C5H & C9H                                                                          | 3.81 (dd)                         |    |    |
|                     | C4H                                                                                | 4.04 (t)                          |    |    |
|                     | C3H                                                                                | 4.21(d) <sup>e</sup>              |    |    |
|                     | C7H                                                                                | 5.40(d)                           |    |    |
| $\alpha$ -Glucose   | C1H                                                                                | 4.63 (d)                          | ↑  | ↑↑ |
| $\beta$ -Glucose    | C1H                                                                                | 5.22 (d)                          | ↑  | ↑↑ |
| Mannose/Trehalose   | C1H                                                                                | 5.19 (d)                          | ↑  | ↑  |
| Glucose-1-phosphate | C1H                                                                                | 5.55 (d,d)                        | ↑↑ | ↑  |
| Phosphagen          |                                                                                    |                                   |    |    |
| Choline/PC          | N-(CH <sub>3</sub> ) <sub>3</sub>                                                  | 3.20 (s)                          | ↑  | ↑↑ |
| GPC                 | N-(CH <sub>3</sub> ) <sub>3</sub>                                                  | 3.22 (s)                          | ↑  | ↑  |
| Osmolytes           |                                                                                    |                                   |    |    |
| Glycerol            | $\frac{1}{2}$ $\gamma$ -CH <sub>2</sub><br>$\frac{1}{2}$ $\gamma$ -CH <sub>2</sub> | 3.63 (d) <sup>e</sup><br>3.65 (d) | ↑  | ↑  |
| Betaine             | N-(CH <sub>3</sub> ) <sub>3</sub><br>$\beta$ -CH <sub>2</sub>                      | 3.26(s)<br>3.91 (s)               | ↓↓ | ↓  |
| TMAO                | N-(CH <sub>3</sub> ) <sub>3</sub>                                                  | 3.27(s) <sup>e</sup>              | ↓↓ | ↓  |
| Nucleotides         |                                                                                    |                                   |    |    |
| Adenine             | C2H                                                                                | 8.19 (s) <sup>e</sup>             | -- | ↓  |



|                                  |                   |                       |    |    |
|----------------------------------|-------------------|-----------------------|----|----|
|                                  | C6H               | 8.19 (s)              |    |    |
| ATP                              | C7H               | 8.61 (s) <sup>ε</sup> | ↑↑ | ↑↑ |
|                                  | C12H              | 8.25 (s)              |    |    |
|                                  | C2H               | 6.13 (d)              |    |    |
| Others                           |                   |                       |    |    |
| Isopropanol                      | β-CH <sub>3</sub> | 1.16 (d)              | -- | -- |
| Ethanol                          | CH <sub>3</sub>   | 1.17 (t)              | -- | ↑↑ |
| 3-hydroxy-<br>isovalerate        | γ-CH <sub>3</sub> | 1.24 (s)              | ↑  | ↑↑ |
| Acetone                          | CH <sub>3</sub>   | 2.22 (s)              | -- | ↑  |
| Aceto-acetate                    | δ-CH <sub>3</sub> | 2.3 (s)               | -- | ↑  |
| N,N-Dimethyl-<br>formamide (DMF) | N-CH <sub>3</sub> | 2.85 (s)              | -- | ↑  |
| Ethanolamine                     | N-CH <sub>2</sub> | 3.13(m)               | ↑  | ↑↑ |
| Methanol                         | CH <sub>3</sub>   | 3.34 (s)              | ↑  | ↑↑ |
| Hydroxy-benzoate<br>derivative   | C2H & C6H         | 7.02 (d) <sup>ε</sup> | ↓  | ↓↓ |
|                                  | C3H & C5H         | 7.79 (d,d)            |    |    |

**Note:** All the values of the metabolites were statistically significant with p value 0.001 respectively. For visualization interpretation, single (↑,↓) and double (↑↑,↓↓) arrows are used to represent relative change in the mean value of metabolite concentration (as evaluated from their respective box-plots). “ε” represents the metabolite peak used for evaluating the quantitative difference as represented here using up (↑) and down (↓) arrows in the case of multiple signals/chemical shift values. “#” The metabolites showing discrepancy in the box-plot calculation because of some outlier values.

## **Appendix S1:**

### **Materials and Methods: NMR Methodology for 2D NMR experiments:**

Unambiguous assignments of various metabolites of *Scenedesmus* sp. IITRIND2 were obtained using two-dimensional *J*-resolved (JRES), TOCSY (total proton-proton correlation spectroscopy) and HSQC (heteronuclear single quantum correlation) spectrum. These spectra were recorded for some of the randomly selected normal and arsenic spiked samples.

Homonuclear 2D *J*-resolved spectra (jresgpprf) were recorded in magnitude mode using quadrature phase (QF) with water pre-saturation during recycle delay (RD) of 2 sec. 16K data points were collected along direct proton (*F2*) dimension with spectral width of 16 ppm, whereas, along indirect *J*-Couplings (*F1*) dimension, 80 points (increments) corresponding to spectral width of 78 Hz (~0.0976 ppm) were collected and for each *F1* increment, 32 transients were acquired. Prior to Fourier transformation (FT), free induction decay (FID) signals were weighted in both dimensions by a sine-bell function and zero-filled in the *F1* dimension to 256 data points. The spectra were tilted by 45° to provide orthogonality of the chemical shift and coupling constant axes and subsequently symmetrized about the *F1* axis.

Two-dimensional <sup>1</sup>H-<sup>1</sup>H TOCSY (dipsi2esgpph) and sensitivity enhanced <sup>1</sup>H-<sup>13</sup>C HSQC (hsqctgpp) spectra were acquired in phase sensitive mode using time proportional phase incrementation (TPPI). 2D TOCSY spectrum was recorded using 2048 data points along direct dimension (*F2*) and 512 increments along indirect dimension (*F1*) with 32 transients per increment and a spectral width of 12 ppm in both dimensions. The FIDs were weighted using a sine-bell-squared function in both dimensions and zero filled to 2048 and 4096 data points, respectively, in the *F1* and *F2* dimensions prior to FT. For TOCSY experiment a mixing time of 80 ms was used. Spin-lock was achieved by a DIPSI2 pulse sequence during the TOCSY mixing time. The relaxation delay (RD) was 3.0 sec.

2D HSQC spectrum was recorded with inverse <sup>13</sup>C detection and using <sup>13</sup>C decoupling during acquisition using GARP-1.2. A relaxation delay of 2.0 sec was used between successive pulse sequence cycles and a refocusing delay equal to  $1/(4 \cdot J_{C-H}) = 1.75$  ms) was employed. 2048 x 256 complex *t2* (<sup>1</sup>H) and *t1* (<sup>13</sup>C) data points with 128 scans per increment were acquired with spectral widths of 12 and 165 ppm, respectively, in the <sup>1</sup>H and <sup>13</sup>C dimensions. The FIDs were weighted using a sine-bell-squared function in both dimensions and zero filled to 4096 and 2048 data points, respectively, in the *F2* and *F1* dimensions prior to FT. After FT, the final spectrum was manually phase corrected and <sup>1</sup>H and <sup>13</sup>C dimensions were referenced to lactate methyl protons and carbon, respectively, at 1.31 and 22.5 ppm.
